# Supplementary material for: Development and evaluation of an algorithm to link mothers and infants in two US commercial healthcare claims databases for pharmacoepidemiology research
Source: Springer Nature journal article supplement (doi:10.1186/s12874-023-02073-6), 2023-10-21
Supplement: MOESM1 [file 26210010]

## **Supplementary appendix to**

*Development and evaluation of an algorithm to link mothers and infants in two US commercial healthcare claims databases for pharmacoepidemiology research*

James Weaver<sup>1</sup>, MS, MPH

Jill H. Hardin<sup>1</sup>, PhD

Clair Blacketer<sup>1</sup>, MPH

Alexis A. Krumme<sup>1</sup>, PhD

Melanie H. Jacobson<sup>1</sup>, PhD

Patrick B. Ryan<sup>1</sup>, PhD

<sup>1</sup>Janssen Research & Development. 1125 Trenton-Harbourton Rd, Titusville NJ 08560, USA

### **Contents:**

A. Databases

B. Algorithm sensitivity implementation descriptions

C. Covariate construction

D. Person and record counts

E. Linkage algorithm sensitivity implementation 1 evaluation results

F. Linkage algorithm sensitivity implementation 2 evaluation results

G. References

## A. Databases

**Table S1.** Database names and descriptions

| Data source                                                                             | Short name     | Description                                                                                                                                                                                                                                                                                                                                                                                                                                                                                                                                                                                                                                                                                                                                                                                                                                                                                                                                                                                         |
|-----------------------------------------------------------------------------------------|----------------|-----------------------------------------------------------------------------------------------------------------------------------------------------------------------------------------------------------------------------------------------------------------------------------------------------------------------------------------------------------------------------------------------------------------------------------------------------------------------------------------------------------------------------------------------------------------------------------------------------------------------------------------------------------------------------------------------------------------------------------------------------------------------------------------------------------------------------------------------------------------------------------------------------------------------------------------------------------------------------------------------------|
| IBM MarketScan Commercial Claims and Encounters Database (CCAIE)                        | CCAIE          | IBM MarketScan Commercial Claims and Encounters Database is a US employer-based private-payer administrative claims database. The data include adjudicated health insurance claims (e.g., inpatient, outpatient, and outpatient pharmacy) as well as enrollment data from large employers and health plans who provide private healthcare coverage to employees, their spouses, and dependents. Additionally, it captures laboratory tests for a subset of the covered lives. This administrative claims database includes a variety of fee-for-service, preferred provider organizations, and capitated health plans.                                                                                                                                                                                                                                                                                                                                                                              |
| Optum® de-Identified Clinformatics® Data Mart Database – Date of Death (Clinformatics®) | Clinformatics® | Optum® De-Identified Clinformatics® Data Mart Database is an adjudicated administrative health claims database for members with private health insurance, who are fully insured in commercial plans or Medicare Advantage. The population is primarily representative of US commercial claims patients (0-65 years old) with some Medicare (65+ years old) however ages are capped at 90 years. It includes data captured from administrative claims processed from inpatient and outpatient medical services and prescriptions as dispensed, as well as results for outpatient lab tests processed by large national lab vendors who participate in data exchange with Optum. Optum DOD also provides date of death (month and year only) for members with both medical and pharmacy coverage from the Social Security Death Master File (however after 2011 reporting frequency changed due to changes in reporting requirements) and location information for patients is at the US state level. |

## **B. Algorithm sensitivity implementation descriptions**

The primary linkage algorithm implementation identified all births for a given mother and required  $\pm 60$ -day correspondence between the infant's date of birth (DOB) and the mother's pregnancy episode end date as described in Step 3. The first sensitivity analysis limited results to first births per mother only and maintained the  $\pm 60$ -day correspondence between the infant's DOB and the mother's pregnancy episode end. The second sensitivity analysis identified all births for a given mother and increased the correspondence between the infant's DOB and the mother's pregnancy episode end to  $\pm 90$ -days. The intent of limiting to first births was to assess whether linked and non-linked mother characteristic differences depended on multiparous status. The intent of extending the pregnancy end/DOB correspondence was to increase linkage sensitivity given that some day-of-birth values were inferred as 1 from typical insurance enrollment start dates and new children may not be enrolled with coverage immediately after birth.

## **C. Covariate construction**

Mothers were characterized by age in years, index year (i.e., year in which pregnancy started/ended), index month, pre- and post-index database observation time in days, pregnancy episode length in days, and the Charlson Comorbidity Index (CCI)[1]. Infants were characterized by sex, index year, index month, and post-index observation time in days. Both mothers and infants were characterized by verbatim condition (SNOMED-CT) and aggregated condition group (SNOMED-CT clinical finding level) occurrences, drug ingredient level (Unified Medical Language System - RxNorm) and aggregated drug group (World Health Organization Anatomical Therapeutic Chemical Classification System 3<sup>rd</sup>, 4<sup>th</sup>, and 5<sup>th</sup> levels) exposures, procedure occurrences, measurement occurrence (but not values), and counts of distinct conditions, drug ingredient exposures, procedures, and measurements. Health care utilization was characterized by proxy using visit counts and counts of specific visit types (outpatient, inpatient, emergency department). Continuous measures were reported with mean, standard deviation, and median and clinical event occurrences were reported as proportions. We chose inferred DOB as the index date for linked infants to ensure covariate capture within enrollment periods where data are expected to be observed. We acknowledge the pregnancy episode end date better represents true birth date because live birth procedures are well-captured in claims data with reliable dates, whereas inferred DOB information is limited or redacted as part of enrollment and de-identification and enrollment date and is an imprecise birth marker. However, for calculating post-birth observation time, we set the index date as pregnancy episode end date.

#### **D. Person and record counts**

- 1) Linked mothers (pregnancy episode start)  
*Mothers linked to  $\geq 1$  infant indexed at pregnancy episode start*
- 2) Linked mothers (pregnancy episode end)  
*Mothers linked to  $\geq 1$  infant indexed at pregnancy episode end*
- 3) Linked infants  
*Infants linked to a mother indexed at pregnancy episode end*
- 4) Not linked mothers (pregnancy episode start)  
*Mothers not linked to an infant indexed at pregnancy episode start*
- 5) Not linked mothers (pregnancy episode end)  
*Mothers not linked to an infant indexed at pregnancy episode end*
- 6) Not linked infants  
*Infants not linked to a mother indexed at inferred DOB*
- 7) All candidate mothers (pregnancy episode start)  
*Mothers without infant linkage restrictions indexed at pregnancy episode start*
- 8) All candidate mothers (pregnancy episode end)  
*Mothers without infant linkage restrictions indexed at pregnancy episode end*
- 9) All candidate infants  
*Infants without linkage restrictions indexed at DOB*

**Table S2.** Person and record counts by database, algorithm implementation and cohort

| Database                              | Algorithm implementation | Cohort Name                                  | Records   | Persons   |
|---------------------------------------|--------------------------|----------------------------------------------|-----------|-----------|
| CCAЕ                                  | All pregnancies - 60d    | Linked mothers (pregnancy episode start)     | 2,528,482 | 2,146,726 |
|                                       |                          | Linked mothers (pregnancy episode end)       | 2,528,482 | 2,146,726 |
|                                       |                          | Linked infants                               | 2,528,482 | 2,528,482 |
|                                       |                          | Not linked mothers (pregnancy episode start) | 995,892   | 917,736   |
|                                       |                          | Not linked mothers (pregnancy episode end)   | 995,892   | 917,736   |
|                                       |                          | Not linked infants                           | 2,406,894 | 2,406,894 |
|                                       |                          | All mothers (pregnancy episode start)        | 3,608,039 | 3,064,263 |
|                                       |                          | All mothers (pregnancy episode end)          | 3,608,039 | 3,064,263 |
|                                       | All infants              | 4,935,376                                    | 4,935,376 |           |
|                                       | First pregnancies - 60d  | Linked mothers (pregnancy episode start)     | 2,146,698 | 2,146,698 |
|                                       |                          | Linked mothers (pregnancy episode end)       | 2,146,698 | 2,146,698 |
|                                       |                          | Linked infants                               | 2,146,698 | 2,146,698 |
|                                       |                          | Not linked mothers (pregnancy episode start) | 917,764   | 917,764   |
|                                       |                          | Not linked mothers (pregnancy episode end)   | 917,764   | 917,764   |
|                                       |                          | Not linked infants                           | 2,788,678 | 2,788,678 |
|                                       |                          | All mothers (pregnancy episode start)        | 3,064,263 | 3,064,263 |
|                                       |                          | All mothers (pregnancy episode end)          | 3,064,263 | 3,064,263 |
|                                       | All infants              | 4,935,376                                    | 4,935,376 |           |
|                                       | All pregnancies - 90d    | Linked mothers (pregnancy episode start)     | 2,567,501 | 2,174,144 |
|                                       |                          | Linked mothers (pregnancy episode end)       | 2,567,501 | 2,174,144 |
|                                       |                          | Linked infants                               | 2,567,501 | 2,567,499 |
|                                       |                          | Not linked mothers (pregnancy episode start) | 965,224   | 890,318   |
|                                       |                          | Not linked mothers (pregnancy episode end)   | 965,224   | 890,318   |
|                                       |                          | Not linked infants                           | 2,367,877 | 2,367,877 |
| All mothers (pregnancy episode start) |                          | 3,608,039                                    | 3,064,263 |           |
| All mothers (pregnancy episode end)   |                          | 3,608,039                                    | 3,064,263 |           |
| All infants                           | 4,935,376                | 4,935,376                                    |           |           |
| Clinformatics®                        | All pregnancies - 60d    | Linked mothers (pregnancy episode start)     | 1,589,010 | 1,301,623 |
|                                       |                          | Linked mothers (pregnancy episode end)       | 1,589,010 | 1,301,623 |
|                                       |                          | Linked infants                               | 1,589,010 | 1,589,010 |
|                                       |                          | Not linked mothers (pregnancy episode start) | 420,199   | 383,007   |
|                                       |                          | Not linked mothers (pregnancy episode end)   | 420,199   | 383,007   |
|                                       |                          | Not linked infants                           | 1,790,801 | 1,790,801 |
|                                       |                          | All mothers (pregnancy episode start)        | 1,986,803 | 1,684,615 |
|                                       |                          | All mothers (pregnancy episode end)          | 1,986,803 | 1,684,615 |
|                                       | All infants              | 3,379,811                                    | 3,379,811 |           |
|                                       | First pregnancies - 60d  | Linked mothers (pregnancy episode start)     | 1,219,859 | 1,219,859 |
|                                       |                          | Linked mothers (pregnancy episode end)       | 1,219,859 | 1,219,859 |
|                                       |                          | Linked infants                               | 1,219,859 | 1,219,859 |
|                                       |                          | Not linked mothers (pregnancy episode start) | 464,771   | 464,771   |
|                                       |                          | Not linked mothers (pregnancy episode end)   | 464,771   | 464,771   |
|                                       |                          | Not linked infants                           | 2,159,952 | 2,159,952 |
|                                       |                          | All mothers (pregnancy episode start)        | 1,684,615 | 1,684,615 |
|                                       |                          | All mothers (pregnancy episode end)          | 1,684,615 | 1,684,615 |
|                                       | All infants              | 3,379,811                                    | 3,379,811 |           |
|                                       | All pregnancies - 90d    | Linked mothers (pregnancy episode start)     | 1,592,785 | 1,303,816 |
|                                       |                          | Linked mothers (pregnancy episode end)       | 1,592,785 | 1,303,816 |
|                                       |                          | Linked infants                               | 1,592,785 | 1,592,785 |
|                                       |                          | Not linked mothers (pregnancy episode start) | 417,842   | 380,814   |
|                                       |                          | Not linked mothers (pregnancy episode end)   | 417,842   | 380,814   |
|                                       |                          | Not linked infants                           | 1,787,026 | 1,787,026 |
| All mothers (pregnancy episode start) |                          | 1,986,803                                    | 1,684,615 |           |
| All mothers (pregnancy episode end)   |                          | 1,986,803                                    | 1,684,615 |           |
| All infants                           | 3,379,811                | 3,379,811                                    |           |           |

CCAЕ: IBM® Marketscan® Commercial Database; Clinformatics®: Optum’s de-identified Clinformatics® Data Mart Database; Std.Diff.: Standardized difference of means

## E. Linkage algorithm sensitivity implementation 1 evaluation results

**Figure S1.** Mother-infant linkage algorithm attrition diagram. Sensitivity algorithm implementation 1: first births,  $\pm 60$ -day pregnancy episode end/infant date-of-birth correspondence. Candidate persons: women whose pregnancy episode(s) ended with live birth and occurred during a mother's observation period; Candidate infants: persons who were 0 years of age at observation period start; Candidate links: candidate mothers-infants who matched on insurance enrollment ID infant's date-of-birth occurred during a candidate mother's observation period; Probable links: restricted candidate links to those where candidate infants date-of-birth occurred within  $\pm 60$  days of the candidate mother's pregnancy episode end date; Inferred links: probable links where those where multiple mothers were associated with one infant were removed; CCAE: IBM<sup>®</sup> MarketScan<sup>®</sup> Commercial Database; Clinformatics<sup>®</sup>: Optum's de-identified Clinformatics<sup>®</sup> Data Mart Database

CCAЕ

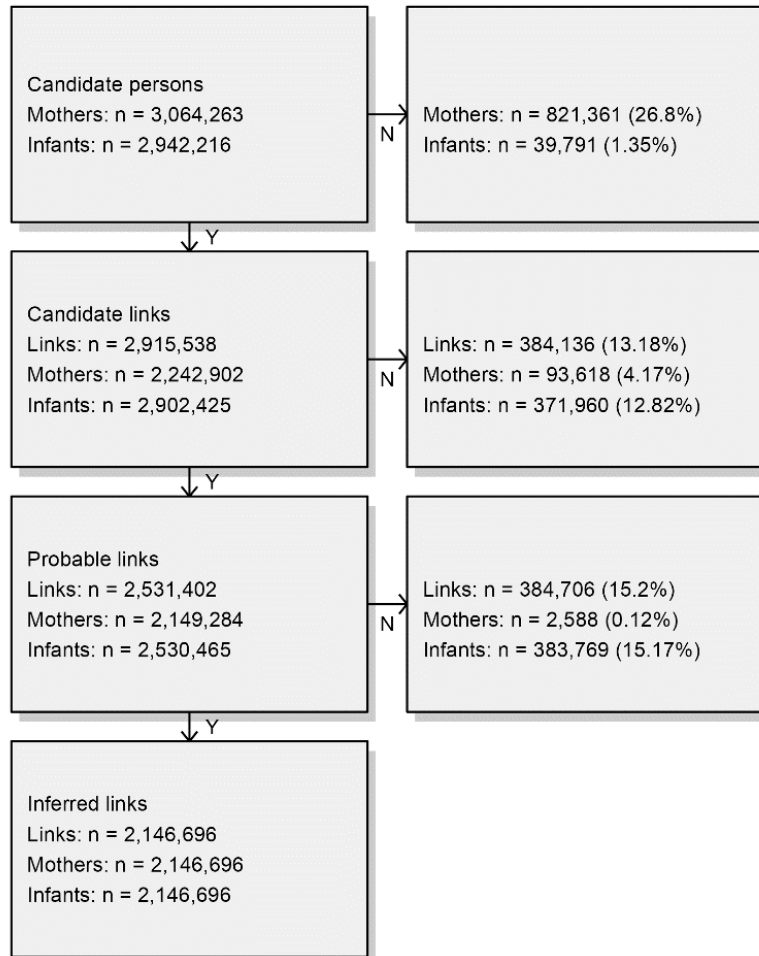

Clinformatics®

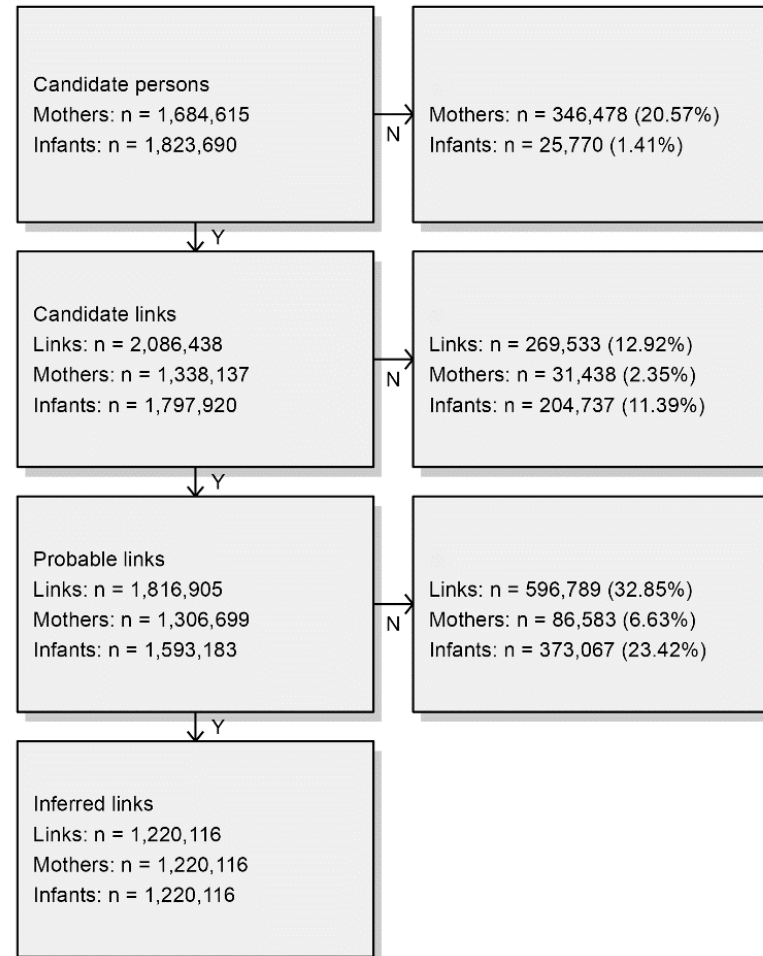

**Figure S2.** Scatter plots of demographic, drug exposure, condition, procedure, measurement, and visit occurrence covariate prevalence comparing linked vs. non-linked mother cohorts indexed at pregnancy episode start (row 1), linked vs non-linked mother cohorts indexed at pregnancy episode end (row 2). Sensitivity algorithm implementation 1: first births,  $\pm 60$ -day pregnancy episode end/infant date-of-birth correspondence. CCAE: IBM® MarketScan® Commercial Database; Clinformatics®: Optum’s de-identified Clinformatics® Data Mart Database.

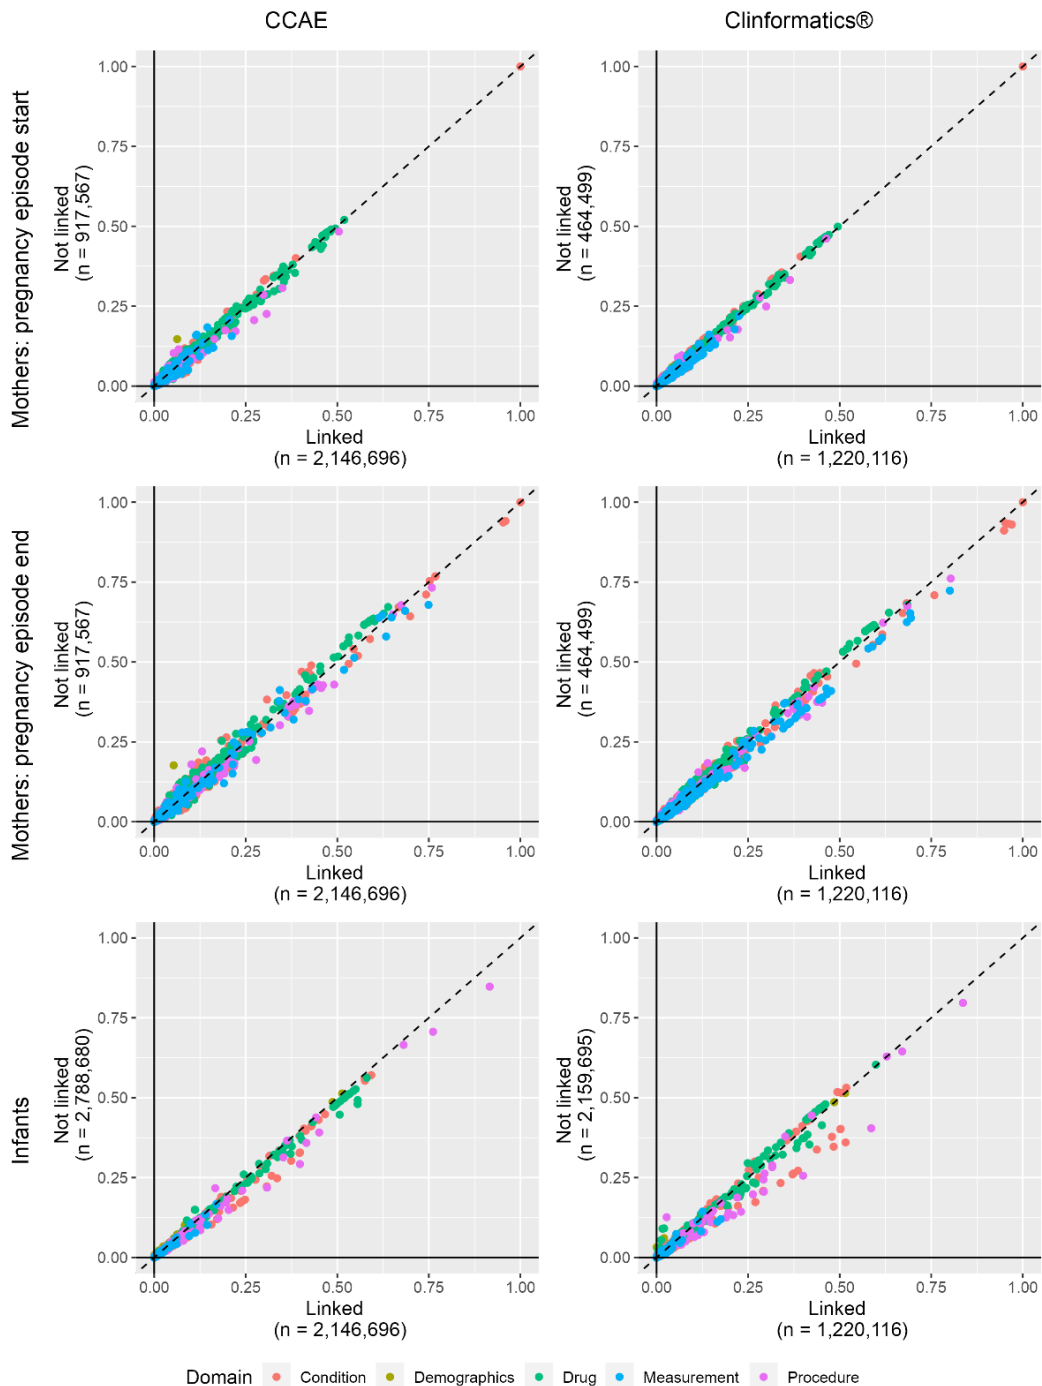



**Table S3.** Selected characteristics and standardized differences of linked and non-linked mothers in IBM® MarketScan® Commercial Database and Optum’s de-identified Clinformatics® Data Mart Database. Mother characteristics were measured on the pregnancy episode start date (index year and month, age) or during the 365-day period before and including the pregnancy episode start date (distinct event occurrence counts). Sensitivity algorithm implementation 1: first births, ±60-day pregnancy episode end/infant date-of-birth correspondence.

| Characteristic                | CCAE                        |                               |          | Clinformatics®              |                               |          |
|-------------------------------|-----------------------------|-------------------------------|----------|-----------------------------|-------------------------------|----------|
|                               | Linked<br>% (n = 2,146,698) | Non-linked<br>% (n = 917,764) | Std.Diff | Linked<br>% (n = 1,219,859) | Non-linked<br>% (n = 464,771) | Std.Diff |
| Index year                    |                             |                               |          |                             |                               |          |
| 2000                          | 0.72                        | 0.78                          | 0.007    | 1.35                        | 2.23                          | 0.066    |
| 2001                          | 1.08                        | 1.21                          | 0.013    | 4.01                        | 5.53                          | 0.071    |
| 2002                          | 2.15                        | 2.16                          | 0        | 4.84                        | 6.42                          | 0.069    |
| 2003                          | 3.46                        | 2.77                          | -0.04    | 4.92                        | 5.79                          | 0.038    |
| 2004                          | 4.34                        | 3.53                          | -0.042   | 4.88                        | 4.96                          | 0.003    |
| 2005                          | 4.16                        | 3.37                          | -0.042   | 6.18                        | 4.73                          | -0.064   |
| 2006                          | 4.92                        | 4.24                          | -0.033   | 6.31                        | 5.28                          | -0.044   |
| 2007                          | 5                           | 4.47                          | -0.025   | 6.31                        | 5.08                          | -0.053   |
| 2008                          | 6.21                        | 5.39                          | -0.035   | 5.85                        | 4.75                          | -0.049   |
| 2009                          | 6.28                        | 5.98                          | -0.012   | 5.01                        | 5.09                          | 0.004    |
| 2010                          | 7.6                         | 6.62                          | -0.038   | 4.4                         | 5.65                          | 0.057    |
| 2011                          | 8.24                        | 8.49                          | 0.009    | 4.21                        | 5.94                          | 0.079    |
| 2012                          | 6.7                         | 7.7                           | 0.038    | 4.68                        | 4.85                          | 0.008    |
| 2013                          | 6.78                        | 7.18                          | 0.016    | 4.59                        | 4.32                          | -0.013   |
| 2014                          | 5.68                        | 6.67                          | 0.041    | 4.32                        | 4.19                          | -0.007   |
| 2015                          | 5.05                        | 5.77                          | 0.032    | 4.56                        | 4.36                          | -0.01    |
| 2016                          | 4.66                        | 5.21                          | 0.025    | 4.69                        | 4.43                          | -0.012   |
| 2017                          | 4.62                        | 4.9                           | 0.013    | 4.85                        | 4.47                          | -0.018   |
| 2018                          | 4.91                        | 5.08                          | 0.008    | 4.89                        | 4.22                          | -0.032   |
| 2019                          | 4.24                        | 4.59                          | 0.017    | 4.57                        | 3.96                          | -0.03    |
| 2020                          | 3.19                        | 3.9                           | 0.038    | 4.45                        | 3.63                          | -0.041   |
| 2021                          | 0                           | 0                             | 0.007    | 0.12                        | 0.14                          | 0.007    |
| Index month                   |                             |                               |          |                             |                               |          |
| 1                             | 10.2                        | 9.8                           | -0.013   | 9.1                         | 9.19                          | 0.003    |
| 2                             | 7.73                        | 10.88                         | 0.109    | 7.87                        | 8.26                          | 0.014    |
| 3                             | 6.26                        | 14.69                         | 0.278    | 7.94                        | 8.96                          | 0.037    |
| 4                             | 7.49                        | 8.42                          | 0.034    | 7.45                        | 7.63                          | 0.007    |
| 5                             | 8.5                         | 7.01                          | -0.056   | 8.27                        | 8.04                          | -0.008   |
| 6                             | 8.36                        | 6.72                          | -0.062   | 8.05                        | 7.87                          | -0.007   |
| 7                             | 8.8                         | 6.81                          | -0.074   | 8.38                        | 8.15                          | -0.008   |
| 8                             | 8.69                        | 6.76                          | -0.072   | 8.3                         | 8.05                          | -0.009   |
| 9                             | 8.6                         | 7.02                          | -0.059   | 8.47                        | 8.26                          | -0.008   |
| 10                            | 8.65                        | 7.35                          | -0.048   | 8.77                        | 8.5                           | -0.01    |
| 11                            | 8.41                        | 7.16                          | -0.047   | 8.66                        | 8.4                           | -0.009   |
| 12                            | 8.32                        | 7.39                          | -0.035   | 8.72                        | 8.67                          | -0.002   |
| Age (years)                   |                             |                               |          |                             |                               |          |
| Mean                          | 31.01                       | 27.38                         | -0.449   | 30.64                       | 28.37                         | -0.274   |
| Std. deviation                | 4.74                        | 6.52                          |          | 4.95                        | 6.63                          |          |
| Median                        | 31                          | 27                            |          | 31                          | 28                            |          |
| Prior observation time (days) |                             |                               |          |                             |                               |          |
| Mean                          | 590.75                      | 750.23                        | 0.146    | 581.03                      | 655.96                        | 0.075    |
| Std. deviation                | 607.94                      | 904.84                        |          | 619.27                      | 779.33                        |          |
| Median                        | 402                         | 441                           |          | 391                         | 403                           |          |
| Post observation time (days)  |                             |                               |          |                             |                               |          |
| Mean                          | 1335.44                     | 955.32                        | -0.254   | 1172.59                     | 1021.04                       | -0.106   |
| Std. deviation                | 1190.85                     | 906.25                        |          | 1062.44                     | 950.33                        |          |
| Median                        | 908                         | 643                           |          | 784                         | 686                           |          |

|                                 |        |        |        |       |        |        |
|---------------------------------|--------|--------|--------|-------|--------|--------|
| Pregnancy episode length (days) |        |        |        |       |        |        |
| Mean                            | 273.37 | 270.19 | -0.107 | 273.1 | 271.46 | -0.056 |
| Std. deviation                  | 18.5   | 23.19  |        | 18.77 | 22.26  |        |
| Median                          | 279    | 277    |        | 278   | 279    |        |
| Distinct conditions             |        |        |        |       |        |        |
| Mean                            | 6.3    | 6.33   | 0.003  | 6.76  | 6.83   | 0.006  |
| Std. deviation                  | 6.37   | 6.78   |        | 6.99  | 7.39   |        |
| Median                          | 4      | 4      |        | 5     | 4      |        |
| Distinct drug ingredients       |        |        |        |       |        |        |
| Mean                            | 4.57   | 4.48   | -0.012 | 4.18  | 4.18   | 0.001  |
| Std. deviation                  | 5.41   | 5.43   |        | 5.18  | 5.31   |        |
| Median                          | 3      | 3      |        | 3     | 3      |        |
| Distinct procedures             |        |        |        |       |        |        |
| Mean                            | 7.13   | 6.3    | -0.082 | 6.98  | 6.6    | -0.036 |
| Std. deviation                  | 7.35   | 7.06   |        | 7.53  | 7.46   |        |
| Median                          | 5      | 4      |        | 5     | 5      |        |
| Distinct measurements           |        |        |        |       |        |        |
| Mean                            | 6.57   | 6.01   | -0.033 | 13.79 | 11.6   | -0.059 |
| Std. deviation                  | 12.03  | 11.75  |        | 27.65 | 25.14  |        |
| Median                          | 3      | 2      |        | 3     | 3      |        |
| Distinct visit types            |        |        |        |       |        |        |
| Outpatient Visit                |        |        |        |       |        |        |
| Mean                            | 6.28   | 5.3    | -0.079 | 5.98  | 5.59   | -0.031 |
| Std. deviation                  | 9.35   | 8.25   |        | 9.09  | 8.71   |        |
| Median                          | 3      | 3      |        | 3     | 3      |        |
| Inpatient Visit                 |        |        |        |       |        |        |
| Mean                            | 0.08   | 0.08   | 0.001  | 0.07  | 0.08   | 0.005  |
| Std. deviation                  | 1.22   | 1.44   |        | 0.72  | 1.02   |        |
| Median                          | 0      | 0      |        | 0     | 0      |        |
| Emergency Room Visit            |        |        |        |       |        |        |
| Mean                            | 0.16   | 0.31   | 0.083  | 0.36  | 0.31   | -0.007 |
| Std. deviation                  | 1.13   | 1.48   |        | 5.62  | 4.97   |        |
| Median                          | 0      | 0      |        | 0     | 0      |        |
| Charlson comorbidity index      |        |        |        |       |        |        |
| Mean                            | 0.17   | 0.18   | 0.012  | 0.2   | 0.21   | 0.012  |
| Std. deviation                  | 0.83   | 0.88   |        | 0.91  | 0.99   |        |
| Median                          | 0      | 0      |        | 0     | 0      |        |

CCAE: IBM® MarketScan® Commercial Database; Clinformatics®: Optum's de-identified Clinformatics® Data Mart Database; Std.Diff.: Standardized difference of means

**Table S4.** Selected characteristics and standardized differences of linked and non-linked mothers in IBM® MarketScan® Commercial Database and Optum’s de-identified Clinformatics® Data Mart Database. Mother characteristics were measured on the pregnancy episode end date (index year and month, age) or during the 365-day period before and including the pregnancy episode end date (distinct event occurrence counts). Sensitivity algorithm implementation 1: first births,  $\pm 60$ -day pregnancy episode end/infant date-of-birth correspondence.

| Characteristic                | CCAЕ                        |                               |          | Clinformatics®              |                               |          |
|-------------------------------|-----------------------------|-------------------------------|----------|-----------------------------|-------------------------------|----------|
|                               | Linked<br>% (n = 2,146,698) | Non-linked<br>% (n = 917,764) | Std.Diff | Linked<br>% (n = 1,220,375) | Non-linked<br>% (n = 464,255) | Std.Diff |
| Index year                    |                             |                               |          |                             |                               |          |
| 2000                          | 0.11                        | 0.33                          | 0.047    | 0.01                        | 0.02                          | 0.012    |
| 2001                          | 0.75                        | 0.93                          | 0.02     | 2.03                        | 3.35                          | 0.082    |
| 2002                          | 1.31                        | 1.61                          | 0.025    | 4.47                        | 6.15                          | 0.075    |
| 2003                          | 2.49                        | 2.39                          | -0.006   | 4.93                        | 6.43                          | 0.065    |
| 2004                          | 3.67                        | 3                             | -0.037   | 4.88                        | 5.51                          | 0.029    |
| 2005                          | 4.38                        | 3.57                          | -0.041   | 5.12                        | 4.53                          | -0.028   |
| 2006                          | 4.22                        | 3.48                          | -0.039   | 6.41                        | 5.03                          | -0.059   |
| 2007                          | 4.97                        | 4.33                          | -0.03    | 6.31                        | 5.29                          | -0.044   |
| 2008                          | 5.35                        | 4.84                          | -0.023   | 6.25                        | 4.98                          | -0.055   |
| 2009                          | 6.53                        | 5.54                          | -0.042   | 5.69                        | 4.67                          | -0.046   |
| 2010                          | 6.27                        | 6.43                          | 0.007    | 4.69                        | 5.45                          | 0.035    |
| 2011                          | 7.8                         | 6.95                          | -0.033   | 4.32                        | 5.74                          | 0.065    |
| 2012                          | 8.08                        | 9.05                          | 0.035    | 4.24                        | 5.9                           | 0.076    |
| 2013                          | 6.52                        | 6.91                          | 0.016    | 4.89                        | 4.45                          | -0.021   |
| 2014                          | 6.79                        | 7.3                           | 0.02     | 4.45                        | 4.25                          | -0.01    |
| 2015                          | 5.21                        | 5.97                          | 0.033    | 4.41                        | 4.25                          | -0.008   |
| 2016                          | 5.14                        | 5.8                           | 0.029    | 4.71                        | 4.45                          | -0.013   |
| 2017                          | 4.66                        | 5.02                          | 0.017    | 4.7                         | 4.45                          | -0.012   |
| 2018                          | 4.68                        | 4.98                          | 0.014    | 4.86                        | 4.41                          | -0.022   |
| 2019                          | 4.77                        | 4.93                          | 0.007    | 4.87                        | 4.18                          | -0.033   |
| 2020                          | 4.16                        | 4.48                          | 0.016    | 4.47                        | 3.83                          | -0.032   |
| 2021                          | 2.14                        | 2.15                          | 0        | 3.29                        | 2.67                          | -0.037   |
| Index month                   |                             |                               |          |                             |                               |          |
| 1                             | 8.17                        | 6.66                          | -0.058   | 7.59                        | 7.47                          | -0.005   |
| 2                             | 7.79                        | 6.14                          | -0.065   | 7.44                        | 7.1                           | -0.013   |
| 3                             | 8.68                        | 6.76                          | -0.072   | 8.31                        | 8.1                           | -0.008   |
| 4                             | 8.48                        | 6.56                          | -0.073   | 8.11                        | 7.89                          | -0.008   |
| 5                             | 8.86                        | 6.81                          | -0.076   | 8.51                        | 8.18                          | -0.012   |
| 6                             | 8.58                        | 7.12                          | -0.054   | 8.43                        | 8.23                          | -0.007   |
| 7                             | 8.64                        | 7.39                          | -0.046   | 8.76                        | 8.49                          | -0.009   |
| 8                             | 8.66                        | 7.39                          | -0.047   | 8.93                        | 8.75                          | -0.006   |
| 9                             | 8.44                        | 7.55                          | -0.033   | 8.67                        | 8.58                          | -0.003   |
| 10                            | 9.81                        | 9                             | -0.028   | 8.79                        | 8.91                          | 0.004    |
| 11                            | 8.56                        | 10.94                         | 0.081    | 8.35                        | 8.62                          | 0.01     |
| 12                            | 5.32                        | 17.68                         | 0.395    | 8.13                        | 9.69                          | 0.055    |
| Age (years)                   |                             |                               |          |                             |                               |          |
| Mean                          | 31.77                       | 27.99                         | -0.471   | 31.38                       | 29.09                         | -0.278   |
| Std. deviation                | 4.74                        | 6.47                          |          | 4.94                        | 6.62                          |          |
| Median                        | 32                          | 28                            |          | 31                          | 29                            |          |
| Prior observation time (days) |                             |                               |          |                             |                               |          |
| Mean                          | 864.12                      | 1020.43                       | 0.143    | 854.17                      | 927.43                        | 0.074    |
| Std. deviation                | 607.63                      | 904.84                        |          | 619.29                      | 778.87                        |          |
| Median                        | 675                         | 714                           |          | 665                         | 675                           |          |
| Post observation time (days)  |                             |                               |          |                             |                               |          |
| Mean                          | 1062.07                     | 685.13                        | -0.252   | 899.9                       | 748.3                         | -0.107   |
| Std. deviation                | 1189.86                     | 905.78                        |          | 1061.97                     | 947.24                        |          |

|                            |       |       |        |       |       |        |
|----------------------------|-------|-------|--------|-------|-------|--------|
| Median                     | 635   | 372   |        | 512   | 414   |        |
| Distinct conditions        |       |       |        |       |       |        |
| Mean                       | 20.01 | 20.6  | 0.039  | 21.28 | 20.79 | -0.031 |
| Std. deviation             | 10.2  | 11.26 |        | 10.75 | 11.35 |        |
| Median                     | 18    | 18    |        | 19    | 18    |        |
| Distinct drug ingredients  |       |       |        |       |       |        |
| Mean                       | 5.35  | 5.61  | 0.034  | 5.67  | 5.7   | 0.004  |
| Std. deviation             | 5.38  | 5.6   |        | 5.42  | 5.68  |        |
| Median                     | 4     | 4     |        | 4     | 4     |        |
| Distinct procedures        |       |       |        |       |       |        |
| Mean                       | 17.72 | 16.8  | -0.076 | 19.52 | 18.5  | -0.081 |
| Std. deviation             | 8.55  | 8.52  |        | 8.81  | 9.01  |        |
| Median                     | 16    | 15    |        | 18    | 17    |        |
| Distinct measurements      |       |       |        |       |       |        |
| Mean                       | 21.24 | 21.01 | -0.01  | 46.41 | 40.93 | -0.108 |
| Std. deviation             | 15.77 | 16.67 |        | 36.8  | 35.2  |        |
| Median                     | 18    | 18    |        | 36    | 27    |        |
| Distinct visit types       |       |       |        |       |       |        |
| Outpatient Visit           |       |       |        |       |       |        |
| Mean                       | 15.46 | 14.23 | -0.087 | 15.55 | 14.6  | -0.062 |
| Std. deviation             | 10.52 | 9.52  |        | 10.89 | 10.7  |        |
| Median                     | 13    | 12    |        | 13    | 12    |        |
| Inpatient Visit            |       |       |        |       |       |        |
| Mean                       | 1.13  | 1.13  | 0.002  | 1.13  | 1.12  | -0.016 |
| Std. deviation             | 0.63  | 0.69  |        | 0.55  | 0.62  |        |
| Median                     | 1     | 1     |        | 1     | 1     |        |
| Emergency Room Visit       |       |       |        |       |       |        |
| Mean                       | 0.34  | 0.65  | 0.139  | 1.03  | 0.9   | -0.019 |
| Std. deviation             | 1.32  | 1.81  |        | 5.01  | 4.64  |        |
| Median                     | 0     | 0     |        | 0     | 0     |        |
| Charlson comorbidity index |       |       |        |       |       |        |
| Mean                       | 0.27  | 0.28  | 0.007  | 0.31  | 0.31  | 0.004  |
| Std. deviation             | 0.89  | 0.94  |        | 0.97  | 1.05  |        |
| Median                     | 0     | 0     |        | 0     | 0     |        |

CCAE: IBM® MarketScan® Commercial Database; Clinformatics®: Optum's de-identified Clinformatics® Data Mart Database; Std.Diff.: Standardized difference of means

**Table S5.** Selected characteristics and standardized differences of linked and non-linked infants in IBM® MarketScan® Commercial Database and Optum’s de-identified Clinformatics® Data Mart Database. Infant characteristics were measured on the pregnancy episode end date (index year and month, age, sex) or during the 365-day period after and including the pregnancy episode end date (distinct event occurrence counts). Sensitivity algorithm implementation 1: first births, ±60-day pregnancy episode end/infant date-of-birth correspondence.

| Characteristic                | CCAE                        |                                 |          | Clinformatics®              |                                 |          |
|-------------------------------|-----------------------------|---------------------------------|----------|-----------------------------|---------------------------------|----------|
|                               | Linked<br>% (n = 2,146,698) | Non-linked<br>% (n = 2,788,678) | Std.Diff | Linked<br>% (n = 1,220,375) | Non-linked<br>% (n = 2,159,436) | Std.Diff |
| Sex                           |                             |                                 |          |                             |                                 |          |
| gender = FEMALE               | 48.7                        | 48.68                           | 0        | 48.51                       | 48.58                           | 0.002    |
| gender = MALE                 | 51.3                        | 51.32                           | 0        | 51.49                       | 51.42                           | -0.002   |
| Index year                    |                             |                                 |          |                             |                                 |          |
| 2000                          | 0.11                        | 0.94                            | 0.115    | 0.01                        | 3.21                            | 0.257    |
| 2001                          | 0.75                        | 0.93                            | 0.02     | 2.03                        | 6.05                            | 0.205    |
| 2002                          | 1.31                        | 2.22                            | 0.069    | 4.46                        | 4.7                             | 0.012    |
| 2003                          | 2.49                        | 3.5                             | 0.059    | 4.93                        | 4.62                            | -0.014   |
| 2004                          | 3.67                        | 3.89                            | 0.012    | 4.88                        | 4.48                            | -0.019   |
| 2005                          | 4.38                        | 4.17                            | -0.01    | 5.11                        | 6.35                            | 0.053    |
| 2006                          | 4.22                        | 4.72                            | 0.024    | 6.41                        | 6.09                            | -0.013   |
| 2007                          | 4.97                        | 4.68                            | -0.013   | 6.31                        | 6.01                            | -0.012   |
| 2008                          | 5.35                        | 6.03                            | 0.029    | 6.24                        | 5.27                            | -0.042   |
| 2009                          | 6.53                        | 6.43                            | -0.004   | 5.7                         | 4.48                            | -0.055   |
| 2010                          | 6.27                        | 7.25                            | 0.039    | 4.69                        | 3.83                            | -0.042   |
| 2011                          | 7.8                         | 7.28                            | -0.02    | 4.33                        | 3.78                            | -0.028   |
| 2012                          | 8.08                        | 7.34                            | -0.028   | 4.23                        | 3.75                            | -0.024   |
| 2013                          | 6.52                        | 6.51                            | 0        | 4.89                        | 4.28                            | -0.029   |
| 2014                          | 6.8                         | 6.52                            | -0.011   | 4.45                        | 4.17                            | -0.013   |
| 2015                          | 5.21                        | 4.51                            | -0.032   | 4.42                        | 4.68                            | 0.013    |
| 2016                          | 5.14                        | 4.51                            | -0.03    | 4.72                        | 4.83                            | 0.005    |
| 2017                          | 4.66                        | 4.37                            | -0.014   | 4.7                         | 4.67                            | -0.001   |
| 2018                          | 4.68                        | 4.71                            | 0.002    | 4.86                        | 4.46                            | -0.019   |
| 2019                          | 4.77                        | 3.98                            | -0.039   | 4.87                        | 4.08                            | -0.038   |
| 2020                          | 4.16                        | 3.78                            | -0.02    | 4.47                        | 3.56                            | -0.047   |
| 2021                          | 2.15                        | 1.75                            | -0.029   | 3.3                         | 2.62                            | -0.04    |
| Index month                   |                             |                                 |          |                             |                                 |          |
| 1                             | 4.88                        | 4.52                            | -0.017   | 7.45                        | 6.35                            | -0.043   |
| 2                             | 7.16                        | 6.43                            | -0.029   | 7.4                         | 6.16                            | -0.049   |
| 3                             | 8.22                        | 7.55                            | -0.025   | 8.29                        | 7                               | -0.048   |
| 4                             | 8.74                        | 8.57                            | -0.006   | 8.11                        | 7.19                            | -0.035   |
| 5                             | 8.58                        | 8.66                            | 0.003    | 8.47                        | 9.92                            | 0.05     |
| 6                             | 8.52                        | 9.07                            | 0.019    | 8.43                        | 8.52                            | 0.003    |
| 7                             | 8.91                        | 10.38                           | 0.05     | 8.79                        | 9.74                            | 0.033    |
| 8                             | 8.45                        | 9.75                            | 0.045    | 8.91                        | 9.48                            | 0.02     |
| 9                             | 8.34                        | 10.12                           | 0.061    | 8.69                        | 9.77                            | 0.037    |
| 10                            | 9.74                        | 9.6                             | -0.005   | 8.8                         | 9.27                            | 0.016    |
| 11                            | 9.47                        | 7.96                            | -0.053   | 8.38                        | 8.27                            | -0.004   |
| 12                            | 8.98                        | 7.38                            | -0.058   | 8.28                        | 8.34                            | 0.002    |
| Post observation time (days)* |                             |                                 |          |                             |                                 |          |
| Mean                          | 1037.59                     | 926.64                          | -0.067   | 808.32                      | 794.99                          | -0.009   |
| Std. deviation                | 1204.51                     | 1131.93                         |          | 1075.10                     | 1025.66                         |          |
| Median                        | 596                         | 515                             |          | 394                         | 422                             |          |
| Distinct conditions           |                             |                                 |          |                             |                                 |          |
| Mean                          | 6.79                        | 5.89                            | -0.095   | 7.63                        | 6.69                            | -0.09    |
| Std. deviation                | 6.9                         | 6.47                            |          | 7.57                        | 7.27                            |          |
| Median                        | 5                           | 4                               |          | 6                           | 5                               |          |
| Distinct drug ingredients     |                             |                                 |          |                             |                                 |          |
| Mean                          | 2.66                        | 2.51                            | -0.032   | 8.35                        | 7.75                            | -0.036   |
| Std. deviation                | 3.43                        | 3.39                            |          | 12.03                       | 11.84                           |          |

|                       |       |       |        |       |       |        |
|-----------------------|-------|-------|--------|-------|-------|--------|
| Median                | 1     | 1     |        | 2     | 2     |        |
| Procedures            |       |       |        |       |       |        |
| Mean                  | 11.54 | 10.11 | -0.139 | 12.11 | 10.47 | -0.151 |
| Std. deviation        | 7.44  | 7.07  |        | 7.76  | 7.53  |        |
| Median                | 10    | 9     |        | 11    | 10    |        |
| Distinct measurements |       |       |        |       |       |        |
| Mean                  | 2.63  | 2.28  | -0.05  | 3.26  | 2.93  | -0.032 |
| Std. deviation        | 5.02  | 4.88  |        | 7.42  | 7.58  |        |
| Median                | 1     | 1     |        | 1     | 1     |        |
| Distinct visit types  |       |       |        |       |       |        |
| Outpatient Visit      |       |       |        |       |       |        |
| Mean                  | 10.05 | 8.87  | -0.127 | 9.3   | 8.62  | -0.063 |
| Std. deviation        | 6.65  | 6.5   |        | 7.68  | 7.59  |        |
| Median                | 9     | 8     |        | 8     | 8     |        |
| Inpatient Visit       |       |       |        |       |       |        |
| Mean                  | 0.68  | 0.52  | -0.216 | 1.03  | 0.75  | -0.411 |
| Std. deviation        | 0.51  | 0.56  |        | 0.46  | 0.51  |        |
| Median                | 1     | 0     |        | 1     | 1     |        |
| Emergency Room Visit  |       |       |        |       |       |        |
| Mean                  | 0.23  | 0.24  | 0.006  | 0.09  | 0.13  | 0.006  |
| Std. deviation        | 0.85  | 0.9   |        | 3.87  | 3.56  |        |
| Median                | 0     | 0     |        | 0     | 0     |        |

CCAE: IBM® MarketScan® Commercial Database; Clinformatics®: Optum's de-identified Clinformatics® Data Mart Database; Std.Diff.: Standardized difference of means

\*Post-index observation time was measured from the linked mother's delivery date (true birth date) and not enrollment start date (inferred birth date)

## F. Linkage algorithm sensitivity implementation 2 evaluation results

**Figure S3.** Mother-infant linkage algorithm attrition diagram. Sensitivity algorithm implementation 2: all births,  $\pm 90$ -day pregnancy episode end/infant date-of-birth correspondence. Candidate persons: women whose pregnancy episode(s) ended with live birth and occurred during a mother's observation period; Candidate infants: persons who were 0 years of age at observation period start; Candidate links: candidate mothers-infants who matched on insurance enrollment ID infant's date-of-birth occurred during a candidate mother's observation period; Probable links: restricted candidate links to those where candidate infants date-of-birth occurred within  $\pm 60$  days of the candidate mother's pregnancy episode end date; Inferred links: probable links where those where multiple mothers were associated with one infant were removed; CCAE: IBM® MarketScan® Commercial Database; Clinformatics®: Optum's de-identified Clinformatics® Data Mart Database

CCAE

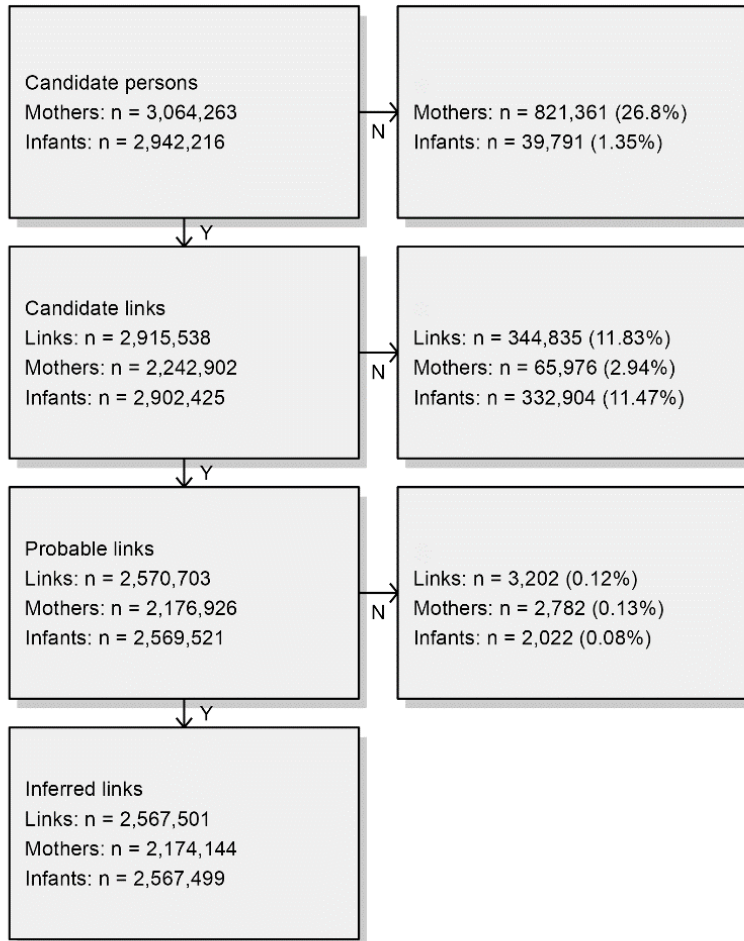

Clinformatics®

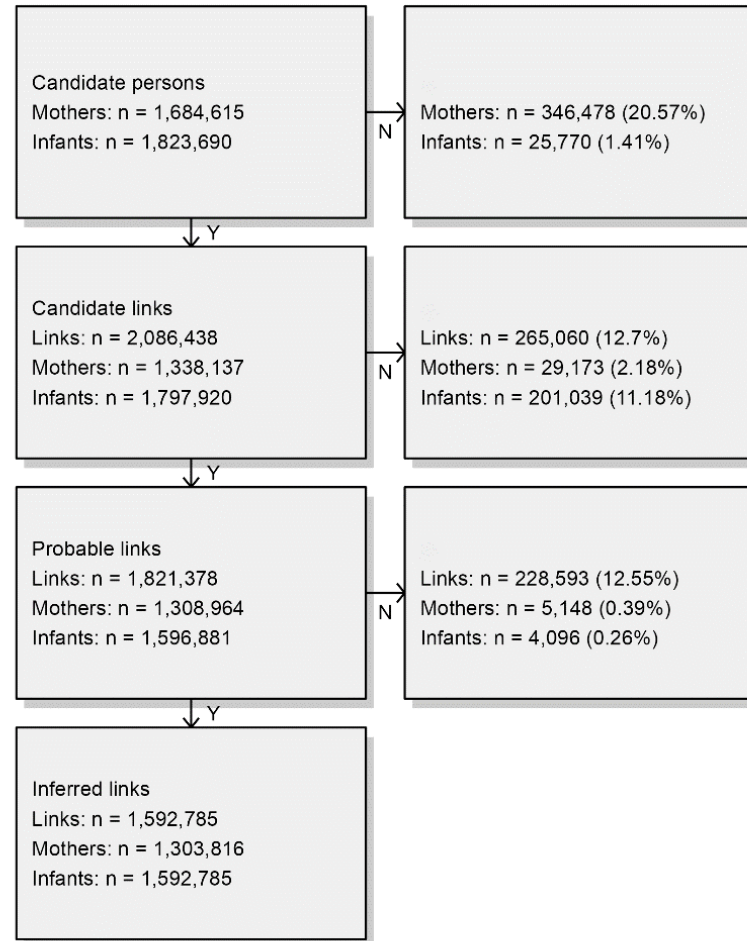



**Figure S4.** Scatter plots of demographic, drug exposure, condition, procedure, measurement, and visit occurrence covariate prevalence comparing linked vs. non-linked mother cohorts indexed at pregnancy episode start (row 1), linked vs non-linked mother cohorts indexed at pregnancy episode end (row 2). Sensitivity algorithm implementation 2: all births,  $\pm 90$ -day pregnancy episode end/infant date-of-birth correspondence. CCAE: IBM® MarketScan® Commercial Database; Clinformatics®: Optum’s de-identified Clinformatics® Data Mart Database.

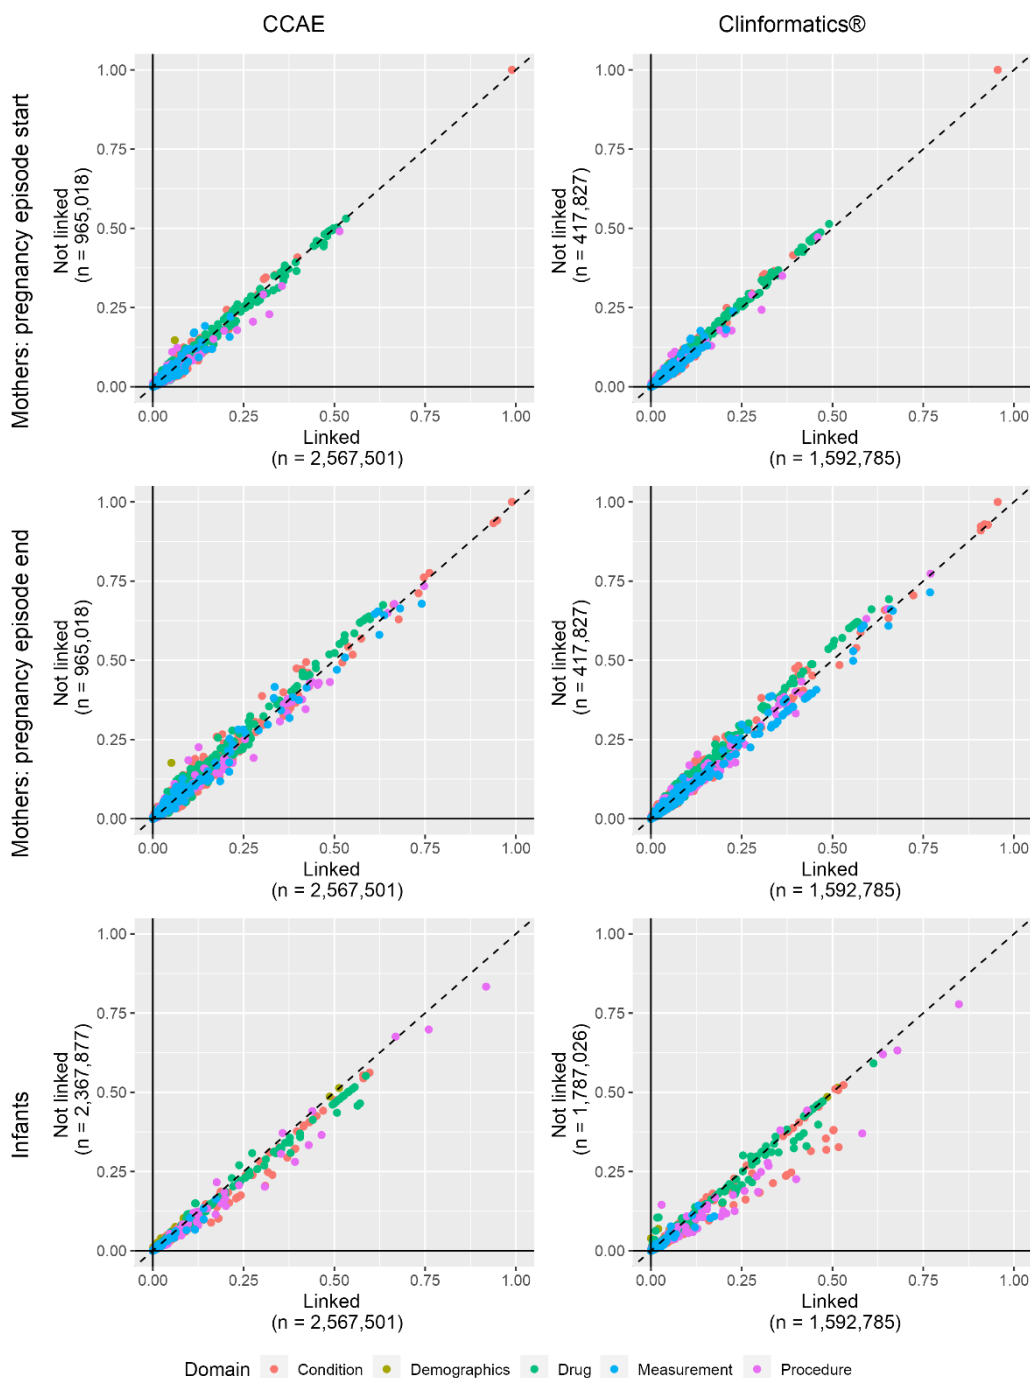

**Table S6.** Selected characteristics and standardized differences of linked and non-linked mothers in IBM® MarketScan® Commercial Database and Optum’s de-identified Clinformatics® Data Mart Database. Mother characteristics were measured on the pregnancy episode start date (index year and month, age) or during the 365-day period before and including the pregnancy episode start date (distinct event occurrence counts). Sensitivity algorithm implementation 2: all births, ±90-day pregnancy episode end/infant date-of-birth correspondence.

| Characteristic                | CCAЕ                        |                               |          | Clinformatics®              |                               |          |
|-------------------------------|-----------------------------|-------------------------------|----------|-----------------------------|-------------------------------|----------|
|                               | Linked<br>% (n = 2,567,501) | Non-linked<br>% (n = 965,224) | Std.Diff | Linked<br>% (n = 1,592,785) | Non-linked<br>% (n = 417,842) | Std.Diff |
| Index year                    |                             |                               |          |                             |                               |          |
| 2000                          | 0.63                        | 0.69                          | 0.007    | 1.36                        | 1.38                          | 0.002    |
| 2001                          | 0.97                        | 1.05                          | 0.008    | 3.84                        | 3.76                          | -0.004   |
| 2002                          | 1.95                        | 1.97                          | 0.001    | 4.72                        | 4.53                          | -0.009   |
| 2003                          | 3.15                        | 2.54                          | -0.037   | 4.84                        | 4.64                          | -0.009   |
| 2004                          | 4.05                        | 3.3                           | -0.04    | 4.8                         | 4.48                          | -0.015   |
| 2005                          | 3.99                        | 3.19                          | -0.043   | 6.18                        | 4.08                          | -0.095   |
| 2006                          | 4.77                        | 4.03                          | -0.036   | 6.3                         | 4.76                          | -0.067   |
| 2007                          | 4.95                        | 4.3                           | -0.031   | 6.31                        | 4.82                          | -0.065   |
| 2008                          | 6.07                        | 5.23                          | -0.036   | 5.92                        | 4.64                          | -0.057   |
| 2009                          | 6.18                        | 5.82                          | -0.015   | 5.12                        | 5.18                          | 0.003    |
| 2010                          | 7.43                        | 6.48                          | -0.037   | 4.54                        | 6                             | 0.065    |
| 2011                          | 8.13                        | 8.42                          | 0.011    | 4.38                        | 6.46                          | 0.092    |
| 2012                          | 6.84                        | 7.74                          | 0.035    | 4.87                        | 5.34                          | 0.021    |
| 2013                          | 6.92                        | 7.35                          | 0.016    | 4.71                        | 4.82                          | 0.005    |
| 2014                          | 5.88                        | 6.9                           | 0.042    | 4.4                         | 4.78                          | 0.018    |
| 2015                          | 5.34                        | 6.04                          | 0.03     | 4.59                        | 5.03                          | 0.02     |
| 2016                          | 4.94                        | 5.51                          | 0.025    | 4.67                        | 5.17                          | 0.023    |
| 2017                          | 4.85                        | 5.16                          | 0.015    | 4.8                         | 5.28                          | 0.022    |
| 2018                          | 5.06                        | 5.33                          | 0.012    | 4.78                        | 5.11                          | 0.016    |
| 2019                          | 4.49                        | 4.82                          | 0.016    | 4.44                        | 4.89                          | 0.022    |
| 2020                          | 3.41                        | 4.13                          | 0.038    | 4.33                        | 4.65                          | 0.016    |
| 2021                          | 0                           | 0.01                          | 0.008    | 0.11                        | 0.18                          | 0.017    |
| Index month                   |                             |                               |          |                             |                               |          |
| 1                             | 9.89                        | 9.9                           | 0        | 9.05                        | 9.15                          | 0.004    |
| 2                             | 7.49                        | 10.96                         | 0.12     | 7.78                        | 8.34                          | 0.021    |
| 3                             | 6.04                        | 14.68                         | 0.287    | 7.85                        | 9.22                          | 0.049    |
| 4                             | 7.41                        | 8.39                          | 0.036    | 7.42                        | 7.7                           | 0.011    |
| 5                             | 8.49                        | 7.01                          | -0.055   | 8.24                        | 7.96                          | -0.01    |
| 6                             | 8.45                        | 6.69                          | -0.066   | 8.08                        | 7.79                          | -0.011   |
| 7                             | 8.93                        | 6.76                          | -0.081   | 8.42                        | 8.09                          | -0.012   |
| 8                             | 8.82                        | 6.74                          | -0.078   | 8.37                        | 8                             | -0.013   |
| 9                             | 8.73                        | 6.99                          | -0.065   | 8.52                        | 8.18                          | -0.012   |
| 10                            | 8.77                        | 7.31                          | -0.054   | 8.79                        | 8.47                          | -0.012   |
| 11                            | 8.53                        | 7.13                          | -0.052   | 8.7                         | 8.4                           | -0.011   |
| 12                            | 8.45                        | 7.42                          | -0.038   | 8.79                        | 8.7                           | -0.003   |
| Age (years)                   |                             |                               |          |                             |                               |          |
| Mean                          | 31.22                       | 27.25                         | -0.496   | 30.93                       | 27.93                         | -0.357   |
| Std. deviation                | 4.68                        | 6.49                          |          | 4.88                        | 6.82                          |          |
| Median                        | 31                          | 27                            |          | 31                          | 28                            |          |
| Prior observation time (days) |                             |                               |          |                             |                               |          |
| Mean                          | 738.68                      | 836.67                        | 0.079    | 715.47                      | 779.41                        | 0.055    |
| Std. deviation                | 744.33                      | 985.54                        |          | 741.19                      | 894.21                        |          |
| Median                        | 505                         | 487                           |          | 476                         | 473                           |          |
| Post observation time (days)  |                             |                               |          |                             |                               |          |
| Mean                          | 1361.93                     | 941.77                        | -0.282   | 1221.32                     | 929.25                        | -0.213   |
| Std. deviation                | 1196.94                     | 883.18                        |          | 1092.65                     | 828.35                        |          |
| Median                        | 932                         | 640                           |          | 825                         | 641                           |          |

|                                 |        |        |        |        |        |        |
|---------------------------------|--------|--------|--------|--------|--------|--------|
| Pregnancy episode length (days) |        |        |        |        |        |        |
| Mean                            | 273.08 | 269.87 | -0.107 | 272.69 | 270.43 | -0.076 |
| Std. deviation                  | 18.59  | 23.46  |        | 18.99  | 23.11  |        |
| Median                          | 278    | 277    |        | 278    | 278    |        |
| Distinct conditions             |        |        |        |        |        |        |
| Mean                            | 6.67   | 6.79   | 0.012  | 6.94   | 7.45   | 0.046  |
| Std. deviation                  | 6.72   | 7.37   |        | 7.38   | 8.18   |        |
| Median                          | 5      | 4      |        | 5      | 5      |        |
| Distinct drug ingredients       |        |        |        |        |        |        |
| Mean                            | 4.68   | 4.62   | -0.007 | 4.14   | 4.45   | 0.041  |
| Std. deviation                  | 5.39   | 5.5    |        | 5.17   | 5.5    |        |
| Median                          | 3      | 3      |        | 3      | 3      |        |
| Distinct procedures             |        |        |        |        |        |        |
| Mean                            | 7.39   | 6.61   | -0.075 | 7.07   | 6.92   | -0.014 |
| Std. deviation                  | 7.39   | 7.29   |        | 7.61   | 7.71   |        |
| Median                          | 5      | 5      |        | 5      | 5      |        |
| Distinct measurements           |        |        |        |        |        |        |
| Mean                            | 6.69   | 6.3    | -0.023 | 13.61  | 12.48  | -0.03  |
| Std. deviation                  | 11.9   | 11.9   |        | 27.48  | 25.89  |        |
| Median                          | 3      | 3      |        | 3      | 3      |        |
| Distinct visit types            |        |        |        |        |        |        |
| Outpatient Visit                |        |        |        |        |        |        |
| Mean                            | 6.61   | 5.49   | -0.087 | 6.38   | 5.89   | -0.035 |
| Std. deviation                  | 9.81   | 8.3    |        | 10.48  | 8.98   |        |
| Median                          | 4      | 3      |        | 3      | 3      |        |
| Inpatient Visit                 |        |        |        |        |        |        |
| Mean                            | 0.11   | 0.11   | -0.001 | 0.1    | 0.11   | 0.003  |
| Std. deviation                  | 1.11   | 1.27   |        | 0.77   | 0.94   |        |
| Median                          | 0      | 0      |        | 0      | 0      |        |
| Emergency Room Visit            |        |        |        |        |        |        |
| Mean                            | 0.16   | 0.34   | 0.092  | 0.38   | 0.33   | -0.007 |
| Std. deviation                  | 1.17   | 1.56   |        | 6.15   | 4.89   |        |
| Median                          | 0      | 0      |        | 0      | 0      |        |
| Charlson comorbidity index      |        |        |        |        |        |        |
| Mean                            | 0.19   | 0.2    | 0.003  | 0.22   | 0.24   | 0.017  |
| Std. deviation                  | 0.85   | 0.89   |        | 0.93   | 1.02   |        |
| Median                          | 0      | 0      |        | 0      | 0      |        |

CCAE: IBM® MarketScan® Commercial Database; Clinformatics®: Optum's de-identified Clinformatics® Data Mart Database; Std.Diff.: Standardized difference of means

**Table S7.** Selected characteristics and standardized differences of linked and non-linked mothers in IBM® MarketScan® Commercial Database and Optum’s de-identified Clinformatics® Data Mart Database. Mother characteristics were measured on the pregnancy episode end date (index year and month, age) or during the 365-day period before and including the pregnancy episode end date (distinct event occurrence counts). Sensitivity algorithm implementation 2: all births, ±90d pregnancy episode end/infant date-of-birth correspondence.

| Characteristic                | CCAЕ                        |                               |          | Clinformatics®              |                               |          |
|-------------------------------|-----------------------------|-------------------------------|----------|-----------------------------|-------------------------------|----------|
|                               | Linked<br>% (n = 2,567,501) | Non-linked<br>% (n = 965,224) | Std.Diff | Linked<br>% (n = 1,592,785) | Non-linked<br>% (n = 417,842) | Std.Diff |
| Index year                    |                             |                               |          |                             |                               |          |
| 2000                          | 0.1                         | 0.31                          | 0.048    | 0.01                        | 0.02                          | 0.01     |
| 2001                          | 0.66                        | 0.84                          | 0.021    | 2.02                        | 2.19                          | 0.012    |
| 2002                          | 1.18                        | 1.43                          | 0.022    | 4.27                        | 4.28                          | 0        |
| 2003                          | 2.24                        | 2.2                           | -0.002   | 4.82                        | 4.66                          | -0.007   |
| 2004                          | 3.35                        | 2.77                          | -0.034   | 4.78                        | 4.56                          | -0.011   |
| 2005                          | 4.11                        | 3.35                          | -0.04    | 5.07                        | 4.04                          | -0.05    |
| 2006                          | 4.05                        | 3.29                          | -0.04    | 6.37                        | 4.42                          | -0.086   |
| 2007                          | 4.84                        | 4.14                          | -0.034   | 6.3                         | 4.84                          | -0.064   |
| 2008                          | 5.28                        | 4.67                          | -0.028   | 6.26                        | 4.79                          | -0.064   |
| 2009                          | 6.37                        | 5.39                          | -0.042   | 5.8                         | 4.59                          | -0.055   |
| 2010                          | 6.18                        | 6.26                          | 0.003    | 4.8                         | 5.63                          | 0.037    |
| 2011                          | 7.63                        | 6.84                          | -0.031   | 4.49                        | 6.14                          | 0.073    |
| 2012                          | 8.01                        | 9.02                          | 0.036    | 4.4                         | 6.46                          | 0.091    |
| 2013                          | 6.7                         | 7                             | 0.012    | 5.07                        | 4.91                          | -0.008   |
| 2014                          | 6.93                        | 7.48                          | 0.021    | 4.55                        | 4.75                          | 0.009    |
| 2015                          | 5.44                        | 6.21                          | 0.033    | 4.47                        | 4.87                          | 0.019    |
| 2016                          | 5.43                        | 6.07                          | 0.027    | 4.73                        | 5.12                          | 0.018    |
| 2017                          | 4.93                        | 5.31                          | 0.017    | 4.68                        | 5.21                          | 0.024    |
| 2018                          | 4.89                        | 5.24                          | 0.016    | 4.8                         | 5.23                          | 0.02     |
| 2019                          | 4.94                        | 5.18                          | 0.011    | 4.74                        | 5.11                          | 0.017    |
| 2020                          | 4.42                        | 4.71                          | 0.014    | 4.34                        | 4.77                          | 0.021    |
| 2021                          | 2.32                        | 2.3                           | -0.001   | 3.23                        | 3.44                          | 0.012    |
| Index month                   |                             |                               |          |                             |                               |          |
| 1                             | 8.12                        | 6.59                          | -0.059   | 7.56                        | 7.42                          | -0.005   |
| 2                             | 7.78                        | 6.13                          | -0.065   | 7.43                        | 7.04                          | -0.015   |
| 3                             | 8.77                        | 6.73                          | -0.076   | 8.33                        | 7.99                          | -0.012   |
| 4                             | 8.61                        | 6.51                          | -0.08    | 8.15                        | 7.81                          | -0.012   |
| 5                             | 8.99                        | 6.81                          | -0.081   | 8.58                        | 8.12                          | -0.017   |
| 6                             | 8.73                        | 7.1                           | -0.06    | 8.47                        | 8.19                          | -0.01    |
| 7                             | 8.77                        | 7.34                          | -0.052   | 8.77                        | 8.5                           | -0.01    |
| 8                             | 8.76                        | 7.37                          | -0.051   | 8.96                        | 8.74                          | -0.008   |
| 9                             | 8.56                        | 7.51                          | -0.039   | 8.72                        | 8.62                          | -0.003   |
| 10                            | 9.55                        | 9.18                          | -0.013   | 8.75                        | 8.87                          | 0.004    |
| 11                            | 8.25                        | 11.09                         | 0.096    | 8.26                        | 8.67                          | 0.015    |
| 12                            | 5.11                        | 17.64                         | 0.403    | 8.03                        | 10.02                         | 0.07     |
| Age (years)                   |                             |                               |          |                             |                               |          |
| Mean                          | 31.98                       | 27.86                         | -0.519   | 31.67                       | 28.65                         | -0.361   |
| Std. deviation                | 4.68                        | 6.43                          |          | 4.88                        | 6.81                          |          |
| Median                        | 32                          | 27                            |          | 32                          | 28                            |          |
| Prior observation time (days) |                             |                               |          |                             |                               |          |
| Mean                          | 1011.76                     | 1106.54                       | 0.077    | 988.16                      | 1049.84                       | 0.053    |
| Std. deviation                | 744                         | 985.32                        |          | 740.95                      | 894.03                        |          |
| Median                        | 778                         | 756                           |          | 749                         | 744                           |          |
| Post observation time (days)  |                             |                               |          |                             |                               |          |
| Mean                          | 1088.85                     | 671.9                         | -0.281   | 948.63                      | 658.82                        | -0.212   |
| Std. deviation                | 1195.92                     | 882.7                         |          | 1091.6                      | 827.58                        |          |
| Median                        | 659                         | 370                           |          | 553                         | 370                           |          |
| Distinct conditions           |                             |                               |          |                             |                               |          |
| Mean                          | 19.78                       | 20.82                         | 0.068    | 20.19                       | 21.44                         | 0.078    |

|                            |       |       |        |       |       |        |
|----------------------------|-------|-------|--------|-------|-------|--------|
| Std. deviation             | 10.21 | 11.43 |        | 10.65 | 11.96 |        |
| Median                     | 17    | 18    |        | 18    | 19    |        |
| Distinct drug ingredients  |       |       |        |       |       |        |
| Mean                       | 5.29  | 5.67  | 0.049  | 5.4   | 6     | 0.075  |
| Std. deviation             | 5.34  | 5.63  |        | 5.39  | 5.84  |        |
| Median                     | 4     | 4     |        | 4     | 4     |        |
| Distinct procedures        |       |       |        |       |       |        |
| Mean                       | 17.44 | 16.84 | -0.05  | 18.59 | 18.55 | -0.003 |
| Std. deviation             | 8.44  | 8.52  |        | 8.72  | 9.1   |        |
| Median                     | 16    | 15    |        | 18    | 17    |        |
| Distinct measurements      |       |       |        |       |       |        |
| Mean                       | 20.8  | 21.03 | 0.01   | 43.99 | 41.65 | -0.046 |
| Std. deviation             | 15.54 | 16.65 |        | 36.44 | 36.04 |        |
| Median                     | 18    | 18    |        | 32    | 27    |        |
| Distinct visit types       |       |       |        |       |       |        |
| Outpatient Visit           |       |       |        |       |       |        |
| Mean                       | 15.52 | 14.2  | -0.089 | 15.7  | 14.76 | -0.054 |
| Std. deviation             | 11.33 | 9.52  |        | 13.45 | 10.96 |        |
| Median                     | 13    | 12    |        | 12    | 12    |        |
| Inpatient Visit            |       |       |        |       |       |        |
| Mean                       | 1.13  | 1.14  | 0.006  | 1.14  | 1.12  | -0.018 |
| Std. deviation             | 0.68  | 0.69  |        | 0.72  | 0.64  |        |
| Median                     | 1     | 1     |        | 1     | 1     |        |
| Emergency Room Visit       |       |       |        |       |       |        |
| Mean                       | 0.33  | 0.67  | 0.149  | 1.03  | 0.98  | -0.007 |
| Std. deviation             | 1.37  | 1.85  |        | 5.63  | 4.52  |        |
| Median                     | 0     | 0     |        | 0     | 0     |        |
| Charlson comorbidity index |       |       |        |       |       |        |
| Mean                       | 0.3   | 0.3   | 0.001  | 0.32  | 0.34  | 0.016  |
| Std. deviation             | 0.9   | 0.94  |        | 0.98  | 1.08  |        |
| Median                     | 0     | 0     |        | 0     | 0     |        |

CCAE: IBM® MarketScan® Commercial Database; Clinformatics®: Optum's de-identified Clinformatics® Data Mart Database; Std.Diff.: Standardized difference of means

**Table S8.** Selected characteristics and standardized differences of linked and non-linked infants in IBM® MarketScan® Commercial Database and Optum’s de-identified Clinformatics® Data Mart Database. Infant characteristics were measured on the inferred pregnancy episode end date (index year and month, age) or during the 365-day period after and including the inferred pregnancy episode end date. (Distinct event occurrence counts). Sensitivity algorithm implementation 2: all births, ±90d pregnancy episode end/infant date-of-birth correspondence

| Characteristic                | CCAE                        |                                 |          | Clinformatics®              |                                 |          |
|-------------------------------|-----------------------------|---------------------------------|----------|-----------------------------|---------------------------------|----------|
|                               | Linked<br>% (n = 2,567,501) | Non-linked<br>% (n = 2,367,877) | Std.Diff | Linked<br>% (n = 1,592,785) | Non-linked<br>% (n = 1,787,026) | Std.Diff |
| Sex                           |                             |                                 |          |                             |                                 |          |
| gender = FEMALE               | 48.72                       | 48.65                           | -0.002   | 48.58                       | 48.55                           | -0.001   |
| gender = MALE                 | 51.28                       | 51.35                           | 0.002    | 51.42                       | 51.45                           | 0.001    |
| Index year                    |                             |                                 |          |                             |                                 |          |
| 2000                          | 0.09                        | 1.1                             | 0.131    | 0.01                        | 3.88                            | 0.283    |
| 2001                          | 0.66                        | 1.06                            | 0.043    | 2.01                        | 6.9                             | 0.238    |
| 2002                          | 1.18                        | 2.52                            | 0.1      | 4.27                        | 4.93                            | 0.031    |
| 2003                          | 2.24                        | 3.95                            | 0.099    | 4.82                        | 4.65                            | -0.008   |
| 2004                          | 3.35                        | 4.28                            | 0.048    | 4.78                        | 4.48                            | -0.014   |
| 2005                          | 4.11                        | 4.42                            | 0.015    | 5.07                        | 6.65                            | 0.067    |
| 2006                          | 4.05                        | 4.98                            | 0.045    | 6.37                        | 6.07                            | -0.013   |
| 2007                          | 4.84                        | 4.77                            | -0.003   | 6.3                         | 5.97                            | -0.014   |
| 2008                          | 5.27                        | 6.23                            | 0.041    | 6.26                        | 5.06                            | -0.052   |
| 2009                          | 6.37                        | 6.58                            | 0.009    | 5.81                        | 4.13                            | -0.077   |
| 2010                          | 6.18                        | 7.52                            | 0.053    | 4.8                         | 3.56                            | -0.062   |
| 2011                          | 7.63                        | 7.38                            | -0.01    | 4.5                         | 3.51                            | -0.05    |
| 2012                          | 8.01                        | 7.27                            | -0.028   | 4.4                         | 3.51                            | -0.046   |
| 2013                          | 6.69                        | 6.33                            | -0.015   | 5.07                        | 3.99                            | -0.052   |
| 2014                          | 6.94                        | 6.32                            | -0.025   | 4.55                        | 4.02                            | -0.026   |
| 2015                          | 5.44                        | 4.14                            | -0.061   | 4.47                        | 4.68                            | 0.01     |
| 2016                          | 5.43                        | 4.08                            | -0.064   | 4.73                        | 4.84                            | 0.005    |
| 2017                          | 4.93                        | 4.02                            | -0.044   | 4.68                        | 4.68                            | 0        |
| 2018                          | 4.89                        | 4.49                            | -0.019   | 4.8                         | 4.44                            | -0.017   |
| 2019                          | 4.94                        | 3.66                            | -0.063   | 4.74                        | 4.04                            | -0.034   |
| 2020                          | 4.42                        | 3.43                            | -0.051   | 4.33                        | 3.49                            | -0.044   |
| 2021                          | 2.33                        | 1.49                            | -0.061   | 3.24                        | 2.54                            | -0.042   |
| Index month                   |                             |                                 |          |                             |                                 |          |
| 1                             | 4.72                        | 4.63                            | -0.004   | 7.41                        | 6.16                            | -0.05    |
| 2                             | 7.01                        | 6.46                            | -0.022   | 7.38                        | 5.92                            | -0.059   |
| 3                             | 8.13                        | 7.53                            | -0.022   | 8.29                        | 6.73                            | -0.059   |
| 4                             | 8.82                        | 8.45                            | -0.013   | 8.15                        | 6.96                            | -0.045   |
| 5                             | 8.68                        | 8.57                            | -0.004   | 8.54                        | 10.16                           | 0.056    |
| 6                             | 8.66                        | 9.02                            | 0.012    | 8.48                        | 8.49                            | 0.001    |
| 7                             | 9.05                        | 10.49                           | 0.049    | 8.8                         | 9.93                            | 0.039    |
| 8                             | 8.55                        | 9.87                            | 0.045    | 8.94                        | 9.57                            | 0.022    |
| 9                             | 8.46                        | 10.3                            | 0.063    | 8.74                        | 9.95                            | 0.041    |
| 10                            | 9.71                        | 9.62                            | -0.003   | 8.78                        | 9.38                            | 0.021    |
| 11                            | 9.33                        | 7.84                            | -0.054   | 8.3                         | 8.32                            | 0.001    |
| 12                            | 8.87                        | 7.22                            | -0.061   | 8.2                         | 8.43                            | 0.009    |
| Post observation time (days)* |                             |                                 |          |                             |                                 |          |
| Mean                          | 1064.77                     | 879.59                          | -0.113   | 855.36                      | 750.73                          | -0.07    |
| Std. deviation                | 1210.01                     | 1107.74                         |          | 1103.43                     | 985.22                          |          |
| Median                        | 621                         | 484                             |          | 432                         | 395                             |          |
| Distinct conditions           |                             |                                 |          |                             |                                 |          |
| Mean                          | 6.78                        | 5.74                            | -0.11    | 7.75                        | 6.39                            | -0.13    |
| Std. deviation                | 6.89                        | 6.4                             |          | 7.65                        | 7.1                             |          |
| Median                        | 5                           | 4                               |          | 6                           | 5                               |          |
| Distinct drug ingredients     |                             |                                 |          |                             |                                 |          |
| Mean                          | 2.69                        | 2.45                            | -0.05    | 8.55                        | 7.44                            | -0.066   |
| Std. deviation                | 3.43                        | 3.38                            |          | 12.05                       | 11.76                           |          |

|                       |       |      |        |       |      |        |
|-----------------------|-------|------|--------|-------|------|--------|
| Median                | 1     | 1    |        | 2     | 2    |        |
| Procedures            |       |      |        |       |      |        |
| Mean                  | 11.5  | 9.9  | -0.157 | 12.27 | 9.99 | -0.212 |
| Std. deviation        | 7.42  | 7.01 |        | 7.83  | 7.36 |        |
| Median                | 10    | 9    |        | 11    | 9    |        |
| Distinct measurements |       |      |        |       |      |        |
| Mean                  | 2.61  | 2.24 | -0.054 | 3.29  | 2.83 | -0.044 |
| Std. deviation        | 4.96  | 4.93 |        | 7.43  | 7.61 |        |
| Median                | 1     | 1    |        | 1     | 1    |        |
| Distinct visit types  |       |      |        |       |      |        |
| Outpatient Visit      |       |      |        |       |      |        |
| Mean                  | 10.06 | 8.66 | -0.151 | 9.47  | 8.32 | -0.107 |
| Std. deviation        | 6.65  | 6.47 |        | 7.74  | 7.5  |        |
| Median                | 9     | 8    |        | 9     | 7    |        |
| Inpatient Visit       |       |      |        |       |      |        |
| Mean                  | 0.67  | 0.5  | -0.217 | 1.03  | 0.69 | -0.491 |
| Std. deviation        | 0.51  | 0.57 |        | 0.47  | 0.51 |        |
| Median                | 1     | 0    |        | 1     | 1    |        |
| Emergency Room Visit  |       |      |        |       |      |        |
| Mean                  | 0.22  | 0.24 | 0.016  | 0.1   | 0.13 | 0.006  |
| Std. deviation        | 0.84  | 0.91 |        | 3.94  | 3.45 |        |
| Median                | 0     | 0    |        | 0     | 0    |        |

CCAE: IBM® MarketScan® Commercial Database; Clinformatics®: Optum's de-identified Clinformatics® Data Mart Database; Std.Diff.: Standardized difference of means

\*Post-index observation time was measured from the linked mother's delivery date (true birth date) and not enrollment start date (inferred birth date)

## G. References

1. Charlson, M.E., et al., *A new method of classifying prognostic comorbidity in longitudinal studies: development and validation*. J Chronic Dis, 1987. **40**(5): p. 373-83.
